# Supplementary material for: Prognostic Value of Coronary Sinus Flow Quantification by Cardiac Magnetic Resonance Imaging in Patients With Acute Myocardial Infarction
Source: PubMed Central journal article supplement — J Am Heart Assoc. 2022 Feb 18;11(5):e023519. doi: 10.1161/JAHA.121.023519 (PMC9075062; doi:10.1161/jaha.121.023519), 2022-02-18
Supplement: JAH3-11-e023519-s001.pdf [file JAH3-11-e023519-s001.pdf]

# **SUPPLEMENTAL MATERIAL**

**Table S1. Clinical characteristics and CMR findings of patients with and without MACE.**

|                                      | Total<br>N = 523 | MACE (+)<br>N = 62 | MACE (-)<br>N = 461 | p value |
|--------------------------------------|------------------|--------------------|---------------------|---------|
| <b><i>Demographics</i></b>           |                  |                    |                     |         |
| Age, y                               | 65 ± 12          | 68 ± 9             | 65 ± 2              | 0.013   |
| Men, n (%)                           | 425 (81.3)       | 49 (79.0)          | 376 (81.6)          | 0.630   |
| Body surface area, m <sup>2</sup>    | 24.1 ± 3.5       | 23.7 ± 3.7         | 24.2 ± 3.4          | 0.300   |
| Body mass index, kg m <sup>-2</sup>  | 1.698 ± 0.184    | 1.664 ± 0.168      | 1.703 ± 0.185       | 0.114   |
| <b><i>Medical history, n (%)</i></b> |                  |                    |                     |         |
| History of MI                        | 58 (11.1)        | 12 (19.4)          | 46 (10.0)           | 0.028   |
| History of PCI                       | 63 (12.0)        | 16 (25.8)          | 47 (10.2)           | < 0.001 |

|                                                  |            |           |            |       |
|--------------------------------------------------|------------|-----------|------------|-------|
| Hypertension, n (%)                              | 327 (62.5) | 41 (66.1) | 286 (62.0) | 0.532 |
| Hyperlipidemia, n (%)                            | 253 (48.4) | 29 (46.8) | 224 (48.6) | 0.790 |
| Diabetes mellitus, n (%)                         | 184 (35.2) | 24 (38.7) | 160 (34.7) | 0.536 |
| Current smoker, n (%)                            | 211 (40.3) | 28 (45.2) | 183 (39.7) | 0.493 |
| Family history, n (%)                            | 54 (10.3)  | 5 (8.1)   | 49 (10.6)  | 0.533 |
| <b><i>Prescription at the time of CMR, n</i></b> |            |           |            |       |
| <b><i>(%):</i></b>                               |            |           |            |       |
| Statin, n (%)                                    | 466 (89.1) | 54 (87.1) | 412 (89.4) | 0.747 |
| ACE-I or ARB, n (%)                              | 398 (76.1) | 45 (72.6) | 353 (76.6) | 0.489 |
| $\beta$ -blocker, n (%)                          | 366 (70.0) | 46 (74.2) | 320 (69.4) | 0.441 |
| Calcium antagonist, n (%)                        | 116 (22.2) | 16 (25.8) | 100 (21.7) | 0.464 |

|                                |                       |                     |                       |         |
|--------------------------------|-----------------------|---------------------|-----------------------|---------|
| <i>ACS presentation</i>        |                       |                     |                       |         |
| Systolic BP at admission, mmHg | 142 ± 29              | 143 ± 25            | 142 ± 29              | 0.166   |
| Heart rate at admission, bpm   | 80 ± 20               | 81 ± 22             | 80 ± 20               | 0.406   |
| STEMI/NSTEMI                   | 325 (62.1)/198 (37.9) | 40 (64.5)/22 (35.5) | 285 (61.8)/176 (38.2) | 0.681   |
| Killip class                   |                       |                     |                       | < 0.001 |
| I                              | 433 (82.8)            | 46 (74.2)           | 387 (83.9)            |         |
| II                             | 42 (8.0)              | 2 (3.2)             | 40 (8.7)              |         |
| III                            | 29 (5.5)              | 9 (14.5)            | 20 (4.3)              |         |
| IV                             | 19 (3.6)              | 5 (8.1)             | 14 (3.0)              |         |
| <i>Coronary angiography</i>    |                       |                     |                       |         |

|                                                        |                                    |                                  |                                    |       |
|--------------------------------------------------------|------------------------------------|----------------------------------|------------------------------------|-------|
| Infarct-related lesion location;<br>RCA/LAD/LCx, n (%) | 173 (33.1)/269 (51.4)/81<br>(15.5) | 24 (38.7)/26 (43.6)/11<br>(17.7) | 149 (32.3)/242 (52.5)/70<br>(15.2) | 0.423 |
| TIMI flow grade at baseline                            |                                    |                                  |                                    | 0.133 |
| 0                                                      | 228 (43.6)                         | 26 (41.9)                        | 202 (43.8)                         |       |
| 1                                                      | 47 (9.0)                           | 1 (1.6)                          | 46 (10.0)                          |       |
| 2                                                      | 115 (22.0)                         | 17 (27.4)                        | 98 (21.3)                          |       |
| 3                                                      | 133 (25.4)                         | 18 (29.0)                        | 115 (24.9)                         |       |
| TIMI flow grade at final                               |                                    |                                  |                                    | 0.743 |
| 0                                                      | 2 (0.4)                            | 0 (0)                            | 2 (0.4)                            |       |
| 1                                                      | 9 (1.7)                            | 2 (3.2)                          | 7 (1.5)                            |       |

|                                                                                  |               |               |               |       |
|----------------------------------------------------------------------------------|---------------|---------------|---------------|-------|
| 2                                                                                | 55 (10.5)     | 6 (9.7)       | 49 (10.6)     |       |
| 3                                                                                | 457 (87.4)    | 54 (87.1)     | 403 (87.4)    |       |
| Multivessel disease, n (%)                                                       | 268 (51.2)    | 41 (66.1)     | 227 (49.2)    | 0.012 |
| Ad-hoc PCI of the non-infarct-related artery during index procedure, n (%)       | 21 (4.0)      | 3 (4.8)       | 18 (3.9)      | 0.725 |
| Staged PCI of the non-infarct-related artery during index hospitalization, n (%) | 140 (26.8)    | 20 (32.3)     | 120 (26.0)    | 0.298 |
| <b><i>Laboratory data</i></b>                                                    |               |               |               |       |
| T-cho1, mg dL <sup>-1</sup>                                                      | 179 (154–211) | 170 (150–198) | 181 (155–214) | 0.182 |

|                                                 |                     |                     |                     |         |
|-------------------------------------------------|---------------------|---------------------|---------------------|---------|
| LDL-chol, mg dL <sup>-1</sup>                   | 111 (88–135)        | 104 (87–132)        | 112 (88–136)        | 0.179   |
| HDL-chol, mg dL <sup>-1</sup>                   | 44 (37–51)          | 42 (35–46)          | 45 (37–52)          | 0.230   |
| TG, mg dL <sup>-1</sup>                         | 110 (73–159)        | 99 (73–137)         | 113 (73–167)        | 0.097   |
| Creatinine, mg dL <sup>-1</sup>                 | 0.85 (0.72–0.98)    | 0.90 (0.76–1.05)    | 0.84 (0.71–0.97)    | 0.153   |
| eGFR, ml min <sup>-1</sup> 1.73 m <sup>-2</sup> | 68.7 (57.7–80.9)    | 64.5 (52.9–75.4)    | 69.6 (58.8–81.3)    | 0.021   |
| HbA1c, %                                        | 6.0 (5.6–6.8)       | 6.2 (5.6–7.0)       | 6.0 (5.6–6.8)       | 0.468   |
| NT-proBNP, ng L <sup>-1</sup>                   | 409 (134–1141)      | 1016 (324–2678)     | 364 (125–957)       | < 0.001 |
| Peak CK, IU L <sup>-1</sup>                     | 1248 (281–2815)     | 1562 (225–3225)     | 1210 (289–2793)     | 0.875   |
| Peak CK-MB, IU L <sup>-1</sup>                  | 115 (28–281)        | 129 (23–369)        | 111 (29–274)        | 0.817   |
| hs-CRP, mg dL <sup>-1</sup>                     | 0.220 (0.090–0.750) | 0.390 (0.120–0.950) | 0.210 (0.090–0.712) | 0.056   |

| <i>CMR indices</i>                                          |                     |                     |                     |        |
|-------------------------------------------------------------|---------------------|---------------------|---------------------|--------|
| EDV, mL                                                     | 117.9 (97.3–140.2)  | 127.7 (103.2–158.2) | 117.0 (96.3–139.4)  | 0.021  |
| ESV, mL                                                     | 51.0 (38.7–73.1)    | 65.9 (42.2–104.3)   | 50.6 (38.5–69.6)    | 0.007  |
| LVMI, g m <sup>-2</sup>                                     | 83.1 (69.9–95.6)    | 92.6 (78.6–107.7)   | 82.0 (69.3–92.9)    | <0.001 |
| EF, %                                                       | 55.4 (45.7–63.2)    | 49.6 (37.3–61.8)    | 56.0 (47.8–63.2)    | 0.012  |
| CSF at rest, ml min <sup>-1</sup>                           | 109.9 (79.9–143.5)  | 122.2 (106.3–172.5) | 106.3 (77.7–141.3)  | 0.005  |
| CSF at rest, ml min <sup>-1</sup> g <sup>-1</sup>           | 0.79 (0.55–1.05)    | 0.85 (0.63–1.03)    | 0.76 (0.55–1.04)    | 0.197  |
| Corrected CSF at rest, ml min <sup>-1</sup>                 | 131.7 (95.1–178.2)  | 144.8 (112.5–194.3) | 129.0 (91.9–174.6)  | 0.020  |
| Corrected CSF at rest, ml min <sup>-1</sup> g <sup>-1</sup> | 0.94 (0.68–1.26)    | 0.94 (0.77–1.28)    | 0.93 (0.67–1.24)    | 0.508  |
| 1                                                           |                     |                     |                     |        |
| CSF at hyperemia, ml min <sup>-1</sup>                      | 290.2 (208.0–367.2) | 258.1 (183.5–309.4) | 293.6 (210.2–368.7) | 0.012  |



|                                                        |                  |                  |                  |         |
|--------------------------------------------------------|------------------|------------------|------------------|---------|
| CSF at hyperemia, ml min <sup>-1</sup> g <sup>-1</sup> | 2.05 (1.42–2.73) | 1.46 (1.16–2.21) | 2.11 (1.49–2.75) | < 0.001 |
| g-CFR                                                  | 2.54 (1.82–3.70) | 1.86 (1.36–2.63) | 2.69 (1.91–3.81) | < 0.001 |
| Corrected g-CFR                                        | 2.17 (1.54–3.03) | 1.60 (1.13–2.20) | 2.25 (1.62–3.10) | < 0.001 |
| LGE volume, cm <sup>3</sup>                            | 9.3 (3.4–16.0)   | 12.3 (4.9–20.4)  | 9.1 (2.7–15.6)   | 0.005   |
| MVO presence, n (%)                                    | 142 (27.2)       | 24 (38.7)        | 118 (25.6)       | 0.043   |

ACE-I: angiotensin-converting enzyme inhibitor; ACS: acute coronary syndrome; ARB: angiotensin receptor blocker; BP: blood pressure; CK: creatine kinase; CK-MB: creatine kinase-myocardial band; CMR: cine-magnetic resonance imaging; CSF: coronary sinus flow; EDV: end diastolic volume; EF, ejection fraction; eGFR: estimated glomerular filtration rate; ESV, end systolic volume; g-CFR: global coronary flow reserve; HbA1c: glycated hemoglobin; HDL-chol: high density lipoprotein cholesterol; hs-CRP: high sense c-reactive protein; LAD: left anterior descending coronary artery; LCx: left circumflex coronary artery; LDL-chol: low density lipoprotein cholesterol; LGE: late gadolinium enhancement; LVMI: left ventricular mass index; MACE: major adverse cardiac events; MI: myocardial infarction; MVO: Microvascular obstruction; NSTEMI: non-ST-segment-elevation myocardial infarction; NT-proBNP: N-terminal pro-B-type natriuretic peptide; PCI: percutaneous coronary intervention; RCA: right coronary artery; STEMI: ST-segment-elevation myocardial infarction; TG: triglyceride; TIMI: thrombolysis in myocardial infarction

**Table S2. Clinical characteristics and CMR findings of patients without untreated functionally significant lesions.**

|                                      | Total<br>N = 490 | MACE (+)<br>N = 55 | MACE (-)<br>N = 435 | p value |
|--------------------------------------|------------------|--------------------|---------------------|---------|
| <b><i>Demographics</i></b>           |                  |                    |                     |         |
| Age, y                               | 65 ± 12          | 68 ± 10            | 65 ± 12             | 0.041   |
| Men, n (%)                           | 396 (80.8)       | 45 (81.8)          | 351 (80.7)          | 0.840   |
| Body surface area, m <sup>2</sup>    | 24.1 ± 3.4       | 23.6 ± 3.1         | 24.2 ± 3.4          | 0.578   |
| Body mass index, kg m <sup>-2</sup>  | 1.699 ± 0.185    | 1.672 ± 0.165      | 1.703 ± 0.187       | 0.382   |
| <b><i>Medical history, n (%)</i></b> |                  |                    |                     |         |
| History of MI                        | 52 (10.6)        | 10 (18.2)          | 42 (9.7)            | 0.028   |
| History of PCI                       | 59 (12.0)        | 13 (23.6)          | 46 (10.6)           | < 0.001 |
| Hypertension, n (%)                  | 303 (61.8)       | 35 (63.6)          | 268 (61.6)          | 0.771   |

|                                                  |            |           |            |       |
|--------------------------------------------------|------------|-----------|------------|-------|
| Hyperlipidemia, n (%)                            | 237 (48.4) | 26 (47.3) | 211 (48.5) | 0.863 |
| Diabetes mellitus, n (%)                         | 173 (35.3) | 20 (36.4) | 153 (35.2) | 0.862 |
| Current smoker, n (%)                            | 201 (41.0) | 17 (30.9) | 184 (42.3) | 0.106 |
| Family history, n (%)                            | 52 (10.6)  | 4 (7.3)   | 48 (11.0)  | 0.393 |
| <b><i>Prescription at the time of CMR, n</i></b> |            |           |            |       |
| <b><i>(%):</i></b>                               |            |           |            |       |
| Statin, n (%)                                    | 415 (84.7) | 54 (87.1) | 412 (89.4) | 0.155 |
| ACE-I or ARB, n (%)                              | 371 (75.7) | 45 (72.6) | 353 (76.6) | 0.830 |
| $\beta$ -blocker, n (%)                          | 339 (69.2) | 46 (74.2) | 320 (69.4) | 0.769 |
| Calcium antagonist, n (%)                        | 108 (22.0) | 16 (25.8) | 100 (21.7) | 0.517 |
| <b><i>ACS presentation</i></b>                   |            |           |            |       |

|                                   |                       |                     |                       |       |
|-----------------------------------|-----------------------|---------------------|-----------------------|-------|
| Systolic BP at admission,<br>mmHg | 142 ± 29              | 145 ± 25            | 141 ± 30              | 0.205 |
| Heart rate at admission, bpm      | 80 ± 20               | 81 ± 21             | 79 ± 19               | 0.455 |
| STEMI/NSTEMI                      | 313 (63.9)/177 (36.1) | 38 (69.1)/17 (30.9) | 275 (63.2)/160 (36.8) | 0.393 |
| Killip class                      |                       |                     |                       | 0.001 |
| I                                 | 411 (83.9)            | 41 (74.5)           | 370 (85.1)            |       |
| II                                | 38 (7.8)              | 2 (3.6)             | 36 (8.3)              |       |
| III                               | 23 (4.7)              | 8 (14.5)            | 15 (3.4)              |       |
| IV                                | 18 (3.7)              | 4 (7.3)             | 14 (3.2)              |       |
| <i>Coronary angiography</i>       |                       |                     |                       |       |

|                                                |                                    |                              |                                    |       |
|------------------------------------------------|------------------------------------|------------------------------|------------------------------------|-------|
| Culprit lesion location;<br>RCA/LAD/LCx, n (%) | 164 (33.5)/252 (51.4)/74<br>(15.1) | 23 (41.8)/23 (41.8)/9 (16.4) | 141 (32.4)/229 (52.7)/65<br>(14.9) | 0.321 |
| TIMI flow grade at baseline                    |                                    |                              |                                    | 0.110 |
| 0                                              | 219 (44.7)                         | 23 (41.8)                    | 196 (45.1)                         |       |
| 1                                              | 45 (9.2)                           | 1 (1.8)                      | 44 (10.1)                          |       |
| 2                                              | 108 (22.0)                         | 17 (30.9)                    | 91 (20.9)                          |       |
| 3                                              | 118 (24.1)                         | 14 (25.5)                    | 104 (23.9)                         |       |
| TIMI flow grade at final                       |                                    |                              |                                    | 0.687 |
| 0                                              | 2 (0.4)                            | 0 (0)                        | 2 (0.5)                            |       |
| 1                                              | 9 (1.8)                            | 2 (3.6)                      | 7 (1.6)                            |       |

|                                                                                  |               |               |               |       |
|----------------------------------------------------------------------------------|---------------|---------------|---------------|-------|
| 2                                                                                | 52 (10.6)     | 5 (9.1)       | 47 (10.8)     |       |
| 3                                                                                | 427 (87.1)    | 48 (87.3)     | 379 (87.1)    |       |
| Multivessel disease, n (%)                                                       | 235 (48.0)    | 34 (61.8)     | 201 (46.2)    | 0.029 |
| Ad-hoc PCI of the non-infarct-related artery during index procedure, n (%)       | 17 (3.5)      | 2 (3.6)       | 15 (3.4)      | 0.943 |
| Staged PCI of the non-infarct-related artery during index hospitalization, n (%) | 120 (24.5)    | 16 (29.1)     | 104 (23.9)    | 0.400 |
| <b><i>Laboratory data</i></b>                                                    |               |               |               |       |
| T-cholesterol, mg dL <sup>-1</sup>                                               | 179 (154–212) | 172 (150–200) | 181 (155–214) | 0.092 |

|                                                 |                     |                     |                     |         |
|-------------------------------------------------|---------------------|---------------------|---------------------|---------|
| LDL-chol, mg dL <sup>-1</sup>                   | 112 (88–135)        | 107 (88–132)        | 112 (88–136)        | 0.418   |
| HDL-chol, mg dL <sup>-1</sup>                   | 44 (37–52)          | 41 (35–46)          | 45 (37–52)          | 0.112   |
| TG, mg dL <sup>-1</sup>                         | 112 (75–166)        | 101 (76–145)        | 116 (74–168)        | 0.213   |
| Creatinine, mg dL <sup>-1</sup>                 | 0.84 (0.71–0.98)    | 0.91 (0.77–1.04)    | 0.84 (0.70–0.97)    | 0.122   |
| eGFR, ml min <sup>-1</sup> 1.73 m <sup>-2</sup> | 68.7 (57.7–81.3)    | 64.5 (53.1–76.7)    | 69.5 (58.3–82.1)    | 0.053   |
| HbA1c, %                                        | 6.0 (5.6–6.8)       | 6.2 (5.6–7.0)       | 6.0 (5.6–6.8)       | 0.616   |
| NT-proBNP, ng L <sup>-1</sup>                   | 371 (131–1040)      | 982 (287–2455)      | 341 (117–930)       | < 0.001 |
| Peak CK, IU L <sup>-1</sup>                     | 1287 (298–2976)     | 1687 (316–3350)     | 1274 (298–2885)     | 0.573   |
| Peak CK-MB, IU L <sup>-1</sup>                  | 118 (29–283)        | 148 (28–378)        | 116 (29–280)        | 0.552   |
| hs-CRP, mg dL <sup>-1</sup>                     | 0.220 (0.090–0.730) | 0.390 (0.123–1.140) | 0.200 (0.090–0.690) | 0.047   |

| <i>CMR indices</i>                                          |                     |                     |                     |         |
|-------------------------------------------------------------|---------------------|---------------------|---------------------|---------|
| EDV, mL                                                     | 118.0 (97.3–139.9)  | 126.9 (102.3–157.9) | 117.0 (96.4–139.4)  | 0.029   |
| ESV, mL                                                     | 51.2 (38.7–71.7)    | 63.4 (42.3–97.1)    | 50.8 (38.4–69.2)    | 0.013   |
| LVMI, g m <sup>-2</sup>                                     | 82.2 (69.4–94.9)    | 91.4 (78.0–106.2)   | 81.4 (68.6–92.7)    | < 0.001 |
| EF, %                                                       | 55.7 (46.2–63.3)    | 50.8 (38.0–61.7)    | 56.0 (47.9–63.3)    | 0.025   |
| CSF at rest, ml min <sup>-1</sup>                           | 108.2 (79.7–143.4)  | 122.3 (100.8–170.8) | 105.9 (77.7–141.9)  | 0.012   |
| CSF at rest, ml min <sup>-1</sup> g <sup>-1</sup>           | 0.79 (0.55–1.05)    | 0.86 (0.68–1.02)    | 0.78 (0.55–1.05)    | 0.254   |
| Corrected CSF at rest, ml min <sup>-1</sup>                 | 130.1 (93.3–177.3)  | 145.4 (113.1–198.5) | 128.2 (91.4–175.5)  | 0.024   |
| Corrected CSF at rest, ml min <sup>-1</sup> g <sup>-1</sup> | 0.94 (0.68–1.26)    | 0.95 (0.80–1.28)    | 0.94 (0.67–1.25)    | 0.497   |
| CSF at hyperemia, ml min <sup>-1</sup>                      | 290.3 (209.9–364.2) | 260.4 (184.0–322.4) | 294.3 (213.9–368.3) | 0.021   |



|                                                        |                  |                  |                  |         |
|--------------------------------------------------------|------------------|------------------|------------------|---------|
| CSF at hyperemia, ml min <sup>-1</sup> g <sup>-1</sup> | 2.06 (1.44–2.73) | 1.45 (1.17–2.29) | 2.14 (1.52–2.78) | < 0.001 |
| g-CFR                                                  | 2.58 (1.84–3.73) | 1.90 (1.36–2.84) | 2.70 (1.93–3.82) | < 0.001 |
| Corrected g-CFR                                        | 2.18 (1.56–3.05) | 1.64 (1.13–2.31) | 2.27 (1.63–3.12) | < 0.001 |
| LGE volume, cm <sup>3</sup>                            | 9.3 (3.3–16.0)   | 12.4 (4.85–20.4) | 9.1 (2.9–15.7)   | 0.006   |
| MVO presence, n (%)                                    | 137 (28.7)       | 22 (40.0)        | 115 (26.4)       | 0.051   |

ACE-I: angiotensin-converting enzyme inhibitor; ACS: acute coronary syndrome; ARB: angiotensin receptor blocker; BP: blood pressure; CK: creatine kinase; CK-MB: creatine kinase-myocardial band; CMR: cine-magnetic resonance imaging; CSF: coronary sinus flow; EDV: end diastolic volume; EF, ejection fraction; eGFR: estimated glomerular filtration rate; ESV, end systolic volume; g-CFR: global coronary flow reserve; HbA1c: glycated hemoglobin; HDL-chol: high density lipoprotein cholesterol; hs-CRP: high sense c-reactive protein; LAD: left anterior descending coronary artery; LCx: left circumflex coronary artery; LDL-chol: low density lipoprotein cholesterol; LGE: late gadolinium enhancement; LVMI: left ventricular mass index; MACE: major adverse cardiac events; MI: myocardial infarction; MVO: Microvascular obstruction; NSTEMI: non-

ST-segment-elevation myocardial infarction; NT-proBNP: N-terminal pro-B-type natriuretic peptide; PCI: percutaneous coronary intervention;

RCA: right coronary artery; STEMI: ST-segment-elevation myocardial infarction; TG: triglyceride; TIMI: thrombolysis in myocardial infarction

**Table S3. Cox proportional-hazard regression analysis of MACE in the whole population.**

|                                                 | Univariable analysis |           |         | Multivariable analysis 1 |           |         |
|-------------------------------------------------|----------------------|-----------|---------|--------------------------|-----------|---------|
|                                                 | HR                   | 95% CI    | p value | HR                       | 95% CI    | p value |
| Age, y                                          | 1.03                 | 1.01–1.06 | 0.012   | 1.02                     | 0.99–1.04 | 0.204   |
| Prior MI                                        | 1.85                 | 0.98–3.48 | 0.056   |                          |           |         |
| Killip class 3 or 4                             | 2.66                 | 1.47–4.83 | 0.001   | 1.36                     | 0.70–2.64 | 0.319   |
| TIMI flow grade at baseline: 0                  | 0.87                 | 0.52–1.43 | 0.572   |                          |           |         |
| TIMI flow grade at final < 3                    | 0.80                 | 0.38–1.69 | 0.558   |                          |           |         |
| Multivessel disease                             | 1.60                 | 0.94–2.70 | 0.082   |                          |           |         |
| eGFR, ml min <sup>-1</sup> 1.73 m <sup>-2</sup> | 0.99                 | 0.97–1.00 | 0.043   | 1.00                     | 0.98–1.01 | 0.421   |
| log (NT-proBNP)                                 | 1.41                 | 1.19–1.68 | < 0.001 | 1.24                     | 1.03–1.49 | 0.020   |
| CRP, mg dL <sup>-1</sup>                        | 1.08                 | 0.94–1.24 | 0.271   |                          |           |         |

|                                          |      |           |         |      |           |                 |
|------------------------------------------|------|-----------|---------|------|-----------|-----------------|
| LVMI, g/m <sup>2</sup>                   | 1.02 | 1.01–1.03 | < 0.001 | 1.01 | 1.00–1.02 | 0.050           |
| EF, %                                    | 0.99 | 0.97–1.01 | 0.333   |      |           |                 |
| CSF at hyperemia, ml/min/g               | 0.58 | 0.43–0.80 | 0.001   |      |           | Not<br>selected |
| Corrected g-CFR                          | 0.56 | 0.42–0.75 | < 0.001 | 0.62 | 0.47–0.82 | 0.001           |
| LGE volume, cm <sup>3</sup>              | 1.03 | 1.01–1.05 | 0.003   | 1.02 | 0.99–1.04 | 0.233           |
| MVO presence                             | 0.79 | 0.43–1.42 | 0.425   |      |           |                 |
| Concordantly impaired h-CSF and<br>g-CFR | 3.16 | 1.91–5.22 | < 0.001 |      |           | Not<br>selected |

---



---

Multivariable analysis 2

---



---



---

Multivariable analysis 3

---

|                                                 | HR   | 95% CI    | p value | HR   | 95% CI    | p value |
|-------------------------------------------------|------|-----------|---------|------|-----------|---------|
| Age, y                                          | 1.02 | 1.00–1.05 | 0.115   | 1.02 | 0.99–1.04 | 0.243   |
| Prior MI                                        |      |           |         |      |           |         |
| Killip class 3 or 4                             | 1.47 | 0.75–2.87 | 0.261   | 1.32 | 0.67–2.62 | 0.201   |
| TIMI flow grade at baseline: 0                  |      |           |         |      |           |         |
| TIMI flow grade at final < 3                    |      |           |         |      |           |         |
| Multivessel disease                             |      |           |         |      |           |         |
| eGFR, ml min <sup>-1</sup> 1.73 m <sup>-2</sup> | 1.00 | 0.98–1.01 | 0.691   | 1.00 | 0.98–1.01 | 0.381   |
| log (NT-proBNP)                                 | 1.35 | 1.13–1.61 | 0.001   | 1.36 | 1.14–1.62 | 0.001   |
| CRP, mg dL <sup>-1</sup>                        |      |           |         |      |           |         |
| LVMI, g/m <sup>2</sup>                          | 1.01 | 0.99–1.02 | 0.370   | 1.01 | 1.00–1.02 | 0.105   |

|                                       |      |           |              |      |           |              |
|---------------------------------------|------|-----------|--------------|------|-----------|--------------|
| EF, %                                 |      |           |              |      |           |              |
| CSF at hyperemia, ml/min/g            | 0.64 | 0.47–0.88 | 0.005        |      |           | Not selected |
| Corrected g-CFR                       |      |           | Not selected |      |           | Not selected |
| LGE volume, cm <sup>3</sup>           | 1.02 | 0.99–1.04 | 0.161        | 1.02 | 0.99–1.04 | 0.146        |
| MVO presence                          |      |           |              |      |           |              |
| Concordantly impaired h-CSF and g-CFR |      |           | Not selected | 2.80 | 1.68–4.65 | < 0.001      |

---

**Table S4. Cox proportional-hazard regression analysis of MACE in the setting of STEMI.**

|                                                 | Univariable analysis |           |         | Multivariable analysis 1 |           |         |
|-------------------------------------------------|----------------------|-----------|---------|--------------------------|-----------|---------|
|                                                 | HR                   | 95% CI    | p value | HR                       | 95% CI    | p value |
| Age, y                                          | 1.02                 | 0.99–1.05 | 0.244   |                          |           |         |
| Prior MI                                        | 2.34                 | 1.03–5.29 | 0.042   |                          |           |         |
| Killip class 3 or 4                             | 3.14                 | 1.60–6.18 | 0.001   | 1.69                     | 0.76–3.78 | 0.200   |
| TIMI flow grade at baseline: 0                  | 0.80                 | 0.43–1.49 | 0.485   |                          |           |         |
| TIMI flow grade at final < 3                    | 0.97                 | 0.45–2.11 | 0.941   |                          |           |         |
| Multivessel disease                             | 1.46                 | 0.77–2.75 | 0.242   |                          |           |         |
| eGFR, ml min <sup>-1</sup> 1.73 m <sup>-2</sup> | 1.00                 | 0.98–1.01 | 0.646   |                          |           |         |
| log (NT-proBNP)                                 | 1.31                 | 1.05–1.64 | 0.016   | 1.099                    | 0.87–1.39 | 0.425   |

|                                          |      |           |         |      |           |                 |
|------------------------------------------|------|-----------|---------|------|-----------|-----------------|
| CRP, mg dL <sup>-1</sup>                 | 0.98 | 0.77–1.24 | 0.854   |      |           |                 |
| LVMI, g/m <sup>2</sup>                   | 1.03 | 1.02–1.04 | < 0.001 | 1.03 | 1.02–1.04 | < 0.001         |
| EF, %                                    | 1.00 | 0.97–1.01 | 0.327   |      |           |                 |
| CSF at hyperemia, ml/min/g               | 0.56 | 0.36–0.84 | 0.006   |      |           | Not<br>selected |
| Corrected g-CFR                          | 0.65 | 0.47–0.90 | 0.009   | 0.67 | 0.49–0.92 | 0.012           |
| LGE volume, cm <sup>3</sup>              | 1.03 | 1.01–1.06 | 0.013   | 1.02 | 0.99–1.05 | 0.328           |
| MVO presence                             | 0.89 | 0.46–1.72 | 0.727   |      |           |                 |
| Concordantly impaired h-CSF and<br>g-CFR | 2.55 | 1.35–4.82 | 0.004   |      |           | Not<br>selected |

---



|                                                 | Multivariable analysis 2 |           |         | Multivariable analysis 3 |             |         |
|-------------------------------------------------|--------------------------|-----------|---------|--------------------------|-------------|---------|
|                                                 | HR                       | 95% CI    | p value | HR                       | 95% CI      | p value |
| Age, y                                          |                          |           |         |                          |             |         |
| Prior MI                                        |                          |           |         |                          |             |         |
| Killip class 3 or 4                             | 3.10                     | 1.57–6.09 | 0.103   | 1.742                    | 0.779–3.892 | 0.180   |
| TIMI flow grade at baseline: 0                  |                          |           |         |                          |             |         |
| TIMI flow grade at final < 3                    |                          |           |         |                          |             |         |
| Multivessel disease                             |                          |           |         |                          |             |         |
| eGFR, ml min <sup>-1</sup> 1.73 m <sup>-2</sup> |                          |           |         |                          |             |         |
| log (NT-proBNP)                                 | 1.15                     | 0.91–1.44 | 0.150   | 1.121                    | 0.884–1.421 | 0.354   |
| CRP, mg dL <sup>-1</sup>                        |                          |           |         |                          |             |         |

|                                       |      |           |              |      |           |              |
|---------------------------------------|------|-----------|--------------|------|-----------|--------------|
| LVMI, g/m <sup>2</sup>                | 1.03 | 1.02–1.04 | < 0.001      | 1.03 | 1.01–1.04 | < 0.001      |
| EF, %                                 |      |           |              |      |           |              |
| CSF at hyperemia, ml/min/g            | 0.56 | 0.37–0.85 | 0.007        |      |           | Not selected |
| Corrected g-CFR                       |      |           | Not selected |      |           | Not selected |
| LGE volume, cm <sup>3</sup>           | 1.02 | 0.99–1.05 | 0.087        | 1.02 | 0.98–1.05 | 0.373        |
| MVO presence                          | 0.56 | 0.37–0.85 | 0.007        |      |           | Not selected |
| Concordantly impaired h-CSF and g-CFR |      |           | Not selected | 2.16 | 1.14–4.11 | 0.018        |

**Table S5. Cox proportional-hazard regression analysis of MACE in the setting of NSTEMI.**

|                                                 | Univariable analysis |            |         | Multivariable analysis 1 |           |         |
|-------------------------------------------------|----------------------|------------|---------|--------------------------|-----------|---------|
|                                                 | HR                   | 95% CI     | p value | HR                       | 95% CI    | p value |
| Age, y                                          | 1.06                 | 1.01–1.11  | 0.010   | 1.05                     | 1.00–1.09 | 0.059   |
| Prior MI                                        | 1.36                 | 0.50–3.69  | 0.547   |                          |           |         |
| Killip class 3 or 4                             | 1.56                 | 0.36–6.67  | 0.553   |                          |           |         |
| TIMI flow grade at baseline: 0                  | 0.98                 | 0.33–2.89  | 0.965   |                          |           |         |
| TIMI flow grade at final < 3                    | 0.05                 | 0.00–85.38 | 0.420   |                          |           |         |
| Multivessel disease                             | 2.08                 | 0.77–5.65  | 0.150   |                          |           |         |
| eGFR, ml min <sup>-1</sup> 1.73 m <sup>-2</sup> | 0.97                 | 0.95–0.99  | 0.008   |                          |           |         |
| log (NT-proBNP)                                 | 1.55                 | 1.20–2.02  | 0.001   | 1.38                     | 1.05–1.81 | 0.023   |
| CRP, mg dL <sup>-1</sup>                        | 1.18                 | 1.00–1.38  | 0.052   |                          |           |         |

|                                          |      |            |         |      |           |                 |
|------------------------------------------|------|------------|---------|------|-----------|-----------------|
| LVMI, g/m <sup>2</sup>                   | 1.01 | 0.99–1.02  | 0.492   |      |           |                 |
| EF, %                                    | 1.00 | 0.96–1.03  | 0.763   |      |           |                 |
| CSF at hyperemia, ml/min/g               | 0.62 | 0.38–1.01  | 0.053   |      |           | Not<br>selected |
| Corrected g-CFR                          | 0.40 | 0.22–0.70  | 0.001   | 0.46 | 0.26–0.83 | 0.010           |
| LGE volume, cm <sup>3</sup>              | 1.04 | 1.00–1.08  | 0.049   |      |           |                 |
| MVO presence                             | 0.33 | 0.04–2.46  | 0.280   |      |           |                 |
| Concordantly impaired h-CSF and<br>g-CFR | 4.57 | 1.98–10.53 | < 0.001 |      |           | Not<br>selected |

---

|                                                 | Multivariable analysis 2 |           |         | Multivariable analysis 3 |           |         |
|-------------------------------------------------|--------------------------|-----------|---------|--------------------------|-----------|---------|
|                                                 | HR                       | 95% CI    | p value | HR                       | 95% CI    | p value |
| Age, y                                          | 1.05                     | 1.00–1.10 | 0.074   | 1.05                     | 1.01–1.10 | 0.018   |
| Prior MI                                        |                          |           |         |                          |           |         |
| Killip class 3 or 4                             |                          |           |         |                          |           |         |
| TIMI flow grade at baseline: 0                  |                          |           |         |                          |           |         |
| TIMI flow grade at final < 3                    |                          |           |         |                          |           |         |
| Multivessel disease                             |                          |           |         |                          |           |         |
| eGFR, ml min <sup>-1</sup> 1.73 m <sup>-2</sup> |                          |           |         |                          |           |         |
| log (NT-proBNP)                                 | 1.55                     | 1.20–2.02 | 0.001   | 1.26                     | 0.94–1.68 | 0.132   |
| CRP, mg dL <sup>-1</sup>                        |                          |           |         |                          |           |         |

LVMI, g/m<sup>2</sup>

EF, %

|                                       |      |           |              |      |              |       |
|---------------------------------------|------|-----------|--------------|------|--------------|-------|
| CSF at hyperemia, ml/min/g            | 0.70 | 0.43–1.13 | 0.141        |      | Not selected |       |
| Corrected g-CFR                       |      |           | Not selected |      | Not selected |       |
| LGE volume, cm <sup>3</sup>           |      |           |              |      |              |       |
| MVO presence                          |      |           |              |      |              |       |
| Concordantly impaired h-CSF and g-CFR |      |           | Not selected | 4.19 | 1.81–9.73    | 0.001 |

---

CI: confidence interval; CRP: c-reactive protein; CSF: coronary sinus flow; EF: ejection fraction; eGFR: estimated glomerular filtration rate; g-

CFR: global coronary flow reserve; HR: hazard ratio; h-CSF: hyperemic coronary sinus flow; LGE: late gadolinium enhancement; LVMI: left

ventricular mass index; MACE: major adverse cardiac events; MI: myocardial infarction; MVO: Microvascular obstruction; NSTEMI: non ST-segment-elevation myocardial infarction; NT-proBNP: N-terminal pro-B-type natriuretic peptide; STEMI: ST-segment-elevation myocardial infarction
